# Supplementary material for: Diversity and Complexity of Internally Deleted Viral Genomes in Influenza A Virus Subpopulations with Enhanced Interferon-Inducing Phenotypes
Source: MDPI journal article supplement (doi:10.3390/v15102107), 2023-10-17
Supplement: s1 [file s1]

Article

# Diversity and Complexity of Internally Deleted Viral Genomes in Influenza A Virus Subpopulations with Enhanced Interferon-Inducing Phenotypes

Amir Ghorbani <sup>1,2,†</sup>, John M. Ngunjiri <sup>2,†</sup>, Gloria Rendon <sup>3</sup>, Christopher B. Brooke <sup>3,4</sup>, Scott P. Kenney <sup>1,2,\*</sup> and Chang-Won Lee <sup>5,\*</sup>

<sup>1</sup> Department of Veterinary Preventive Medicine, College of Veterinary Medicine, The Ohio State University, Columbus, OH 43210, USA; amir.ghorbani@nih.gov

<sup>2</sup> Center for Food Animal Health, Ohio Agricultural Research and Development Center, The Ohio State University, Wooster, OH 44691, USA; john.ngunjiri@targan.com

<sup>3</sup> Carl R. Woese Institute for Genomic Biology, University of Illinois at Urbana-Champaign, Urbana, IL 61801, USA; gloriarendon@gmail.com (G.R.); cbrooke@illinois.edu (C.B.B.)

<sup>4</sup> Department of Microbiology, University of Illinois at Urbana-Champaign, Urbana, IL 61801, USA

<sup>5</sup> Southeast Poultry Research Laboratory, US National Poultry Research Center, USDA, ARS, Athens, GA 30605, USA

\* Correspondence: kenney.157@osu.edu (S.P.K.); chang.lee@usda.gov (C.-W.L.)

† Current address: Cellular Biology Section, Laboratory of Viral Diseases, National Institute of Allergy and Infectious Diseases, National Institutes of Health, Bethesda, MD 20892, USA.

‡ Current address: TARGAN Inc., 350 E. Six Forks Rd., Raleigh, NC 27609, USA.

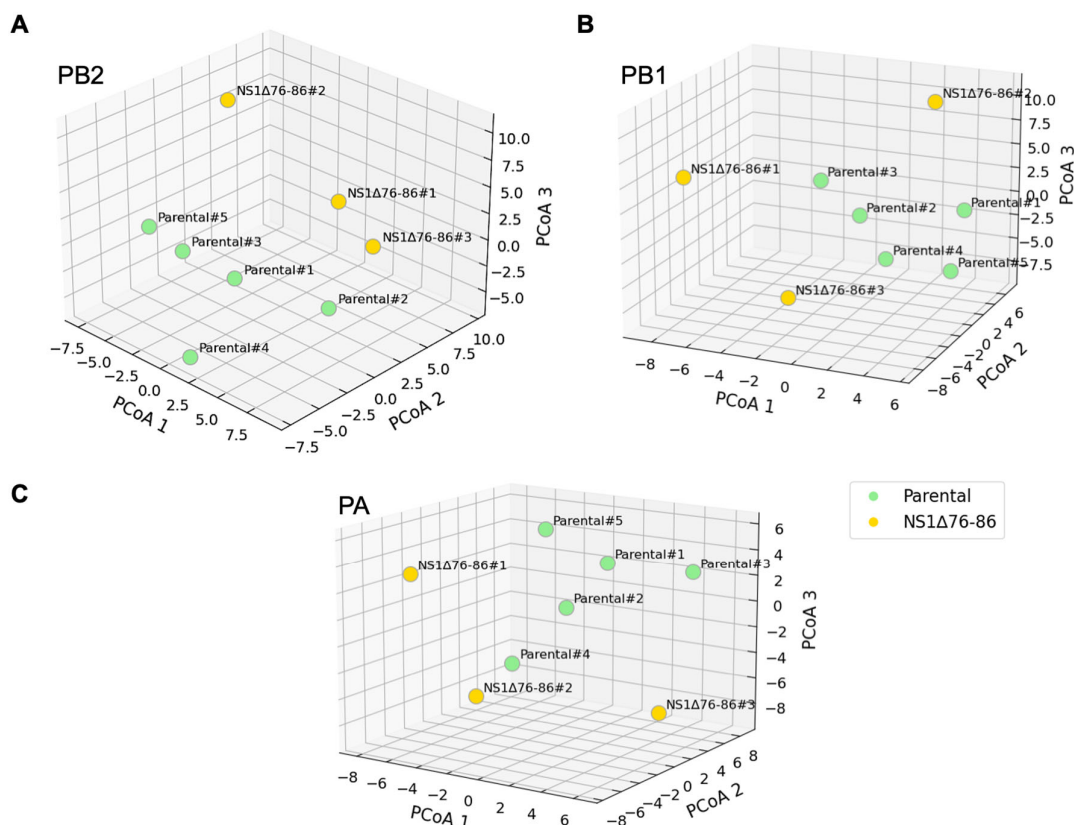

**Supplementary Figure S1.** Principal component analysis (PCoA) based on Euclidean distances among the abundance of ID vRNA and the break and rejoin sites for PB2 (A), PB1 (B), and PA (C)-derived ID vRNAs detected in parental (green) and NS1Δ76-86 (golden) clones. The NS1Δ76-86 clones appeared to have greater separation from each other than the parental clones.

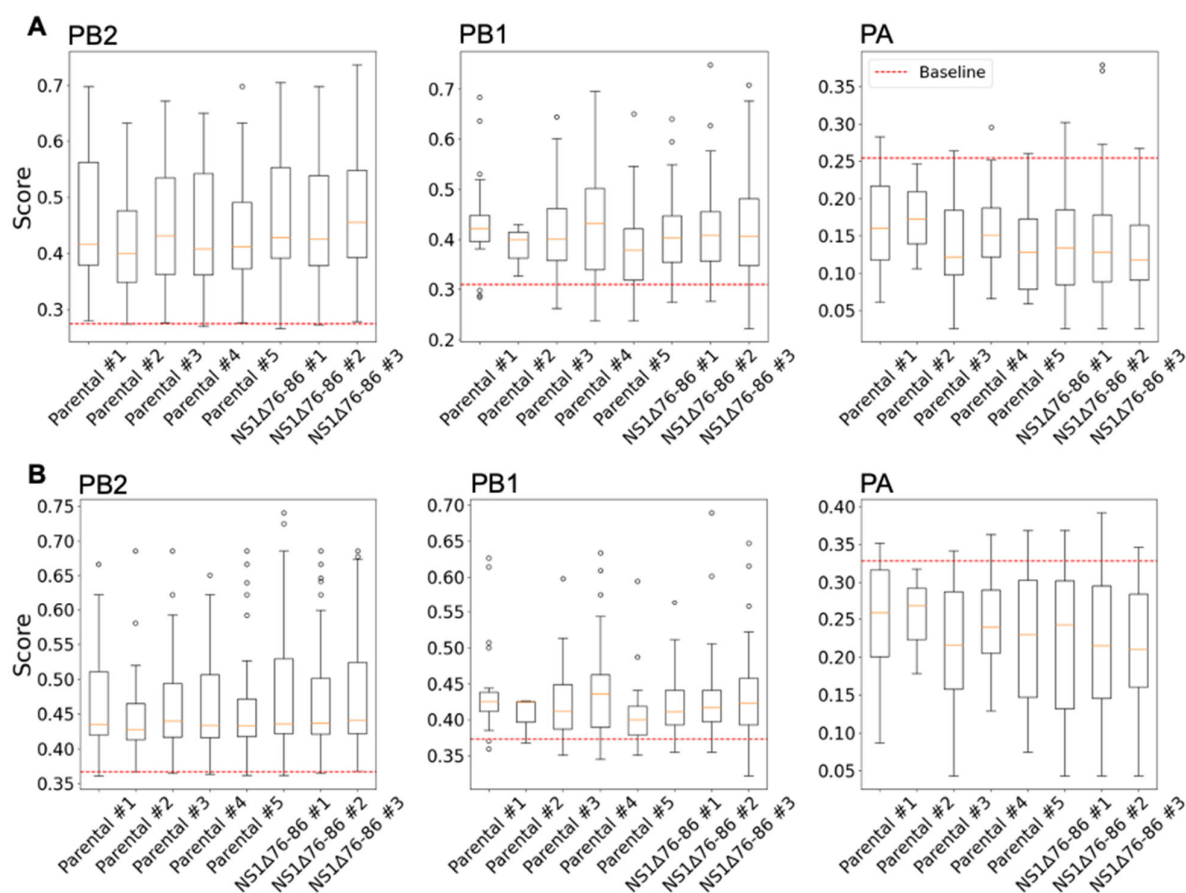

**Supplementary Figure S2.** Prediction of the disordered nature of putative viral polypeptides encoded by the ID vRNAs from each plaque-purified clone. No significant differences were observed between the average IUPred3 (**A**) and ANCHOR2 (**B**) values among the viral clones with distinct IFN-inducing phenotypes. Red dotted lines represent the mean value estimated for the intact PB2, PB1, or PA viral proteins.
